# Supplementary material for: The Peanut Skin Procyanidins Attenuate DSS-Induced Ulcerative Colitis in C57BL/6 Mice
Source: MDPI journal article supplement (doi:10.3390/antiox11112098), 2022-10-25
Supplement: s1 [file s1]

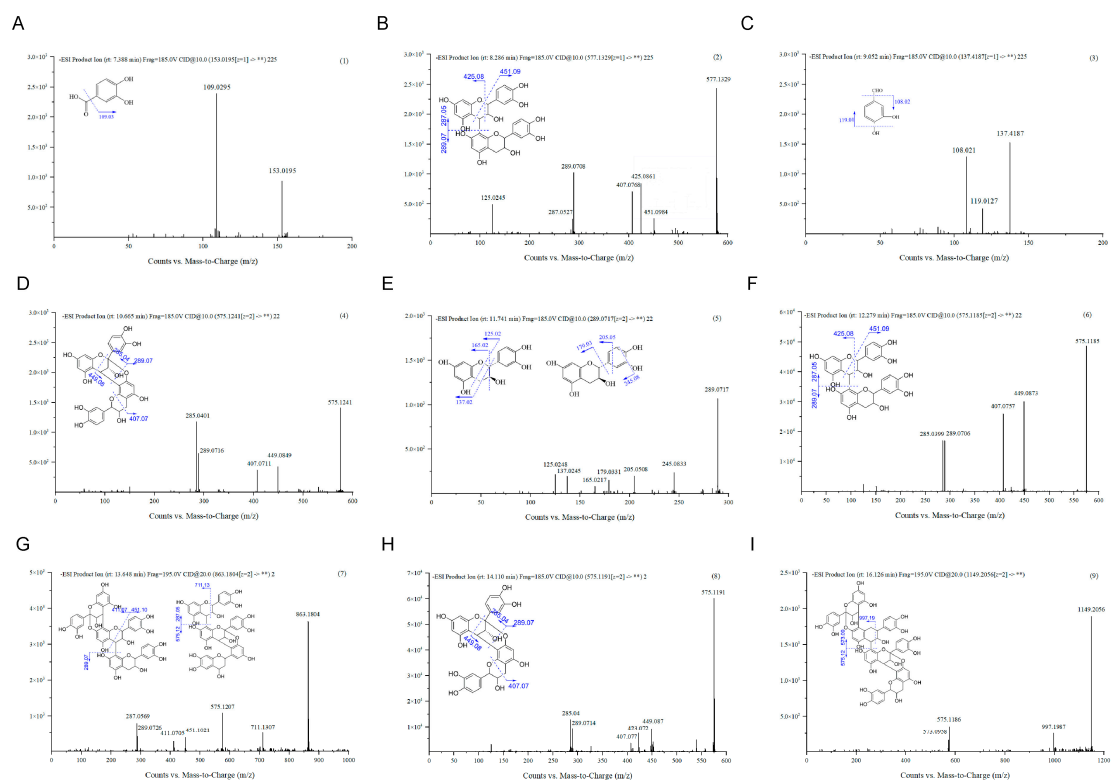

**Figure S1.** Composition of PSPc. (A)MS/MS spectra of compounds 1 in negative ion mode; (B)MS/MS spectra of compounds 2 in negative ion mode; (C)MS/MS spectra of compounds 3 in negative ion mode; (D)MS/MS spectra of compounds 4 in negative ion mode; (E)MS/MS spectra of compounds 5 in negative ion mode; (F)MS/MS spectra of compounds 6 in negative ion mode; (G)MS/MS spectra of compounds 7 in negative ion mode; (H)MS/MS spectra of compounds 8 in negative ion mode; (I)MS/MS spectra of compounds 9 in negative ion mode.
